# Supplementary material for: Synthesis, characterization, thermal properties of silicon(iv) compounds containing guanidinato ligands and their potential as CVD precursors
Source: Royal Society of Chemistry journal article supplement (doi:10.1039/c5ra09755j), 2015-01-01

## Supporting Information

### **Synthesis, Characterization, Thermal Properties of Silicon(IV) Compounds Containing Guanidinato Ligands and Their Potential as CVD Precursors**

Liyong Du,<sup>†</sup> Wenxiang Chu,<sup>†</sup> Hongyan Miao,<sup>†</sup> Chongying Xu\*<sup>†‡</sup> and Yuqiang Ding\*<sup>†</sup>

<sup>†</sup> The Key Laboratory of Food Colloids and Biotechnology, Ministry of Education, School of Chemical and Material Engineering, Jiangnan University, Wuxi 214122, Jiangsu Province, China.

<sup>‡</sup> Jiangsu Nata Opto-Electronic Material Co. Ltd. 7F One Lakepoint, No. 9 Cuiwei Street, Suzhou Industrial Park, Jiangsu Province, China.

#### **Table of Contents**

|                                             |            |
|---------------------------------------------|------------|
| <b>The NMR copies of compounds 1-2.....</b> | <b>S2</b>  |
| <b>STA curves .....</b>                     | <b>S8</b>  |
| <b>SEM images .....</b>                     | <b>S10</b> |
| <b>Deposition furnace.....</b>              | <b>S10</b> |

The  $^1\text{H}$ ,  $^{13}\text{C}$ ,  $^{29}\text{Si}$  NMR( $\text{CDCl}_3$ ,  $25^\circ\text{C}$ ) copies of compounds 1:

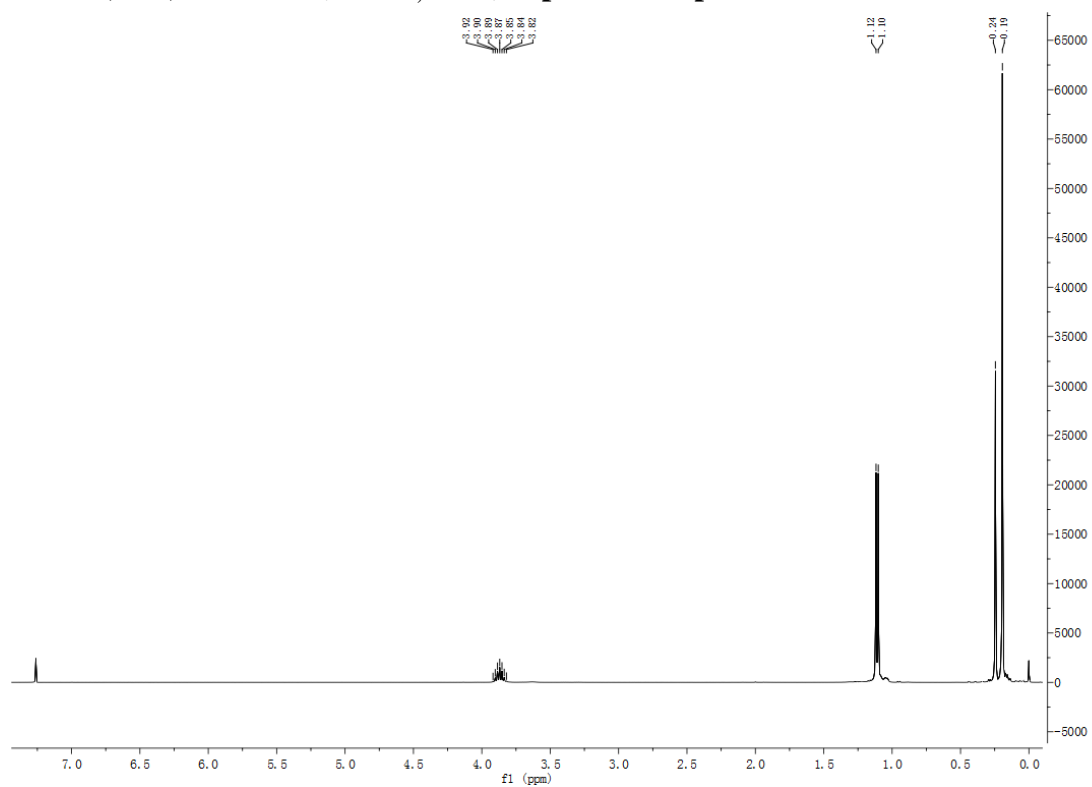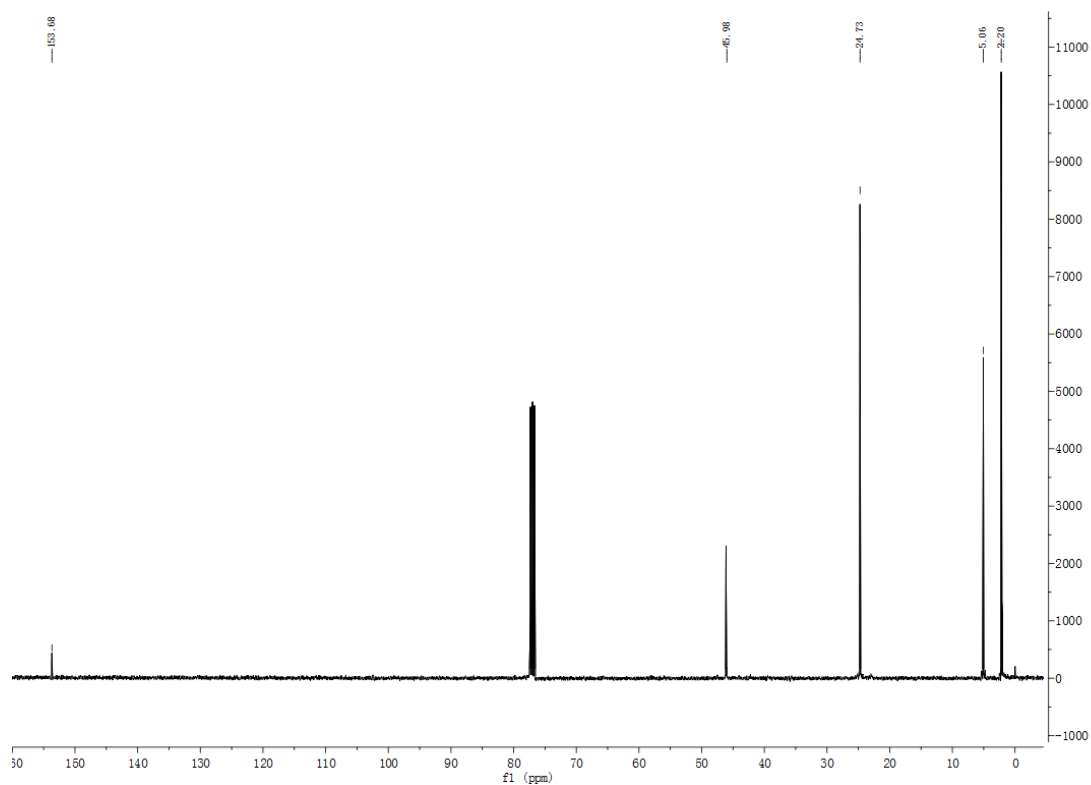

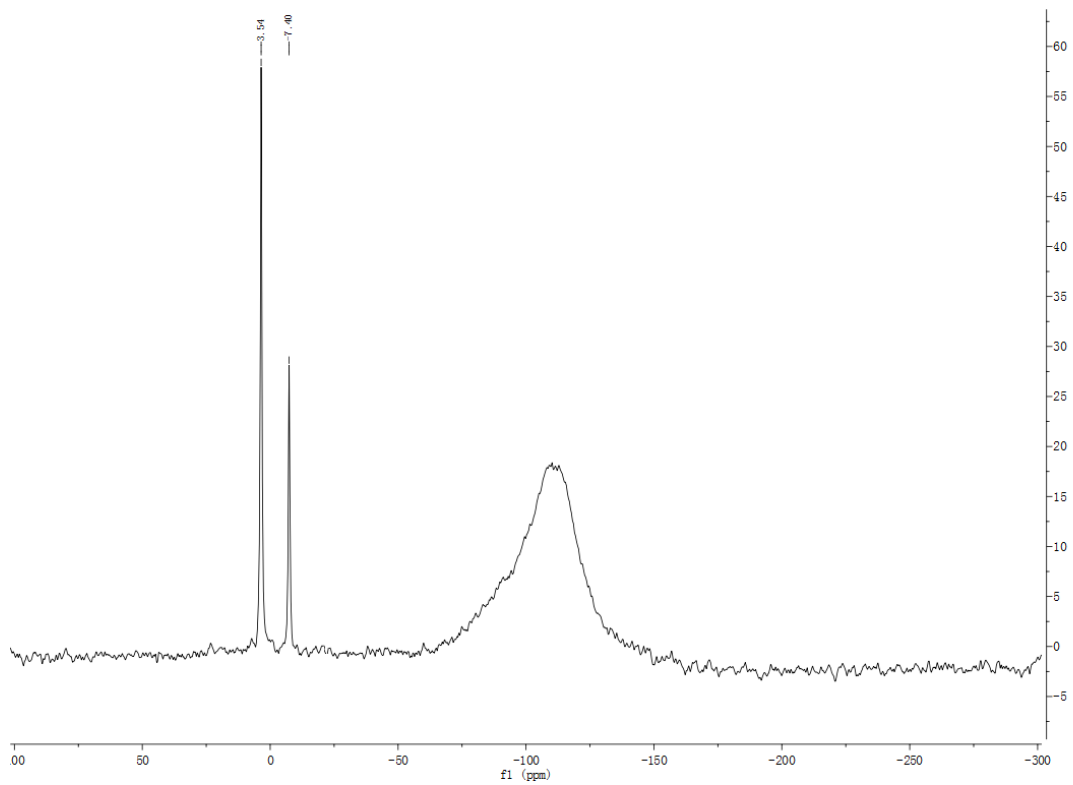

**$^{29}\text{Si}$  CP/MAS NMR(solid state) :**

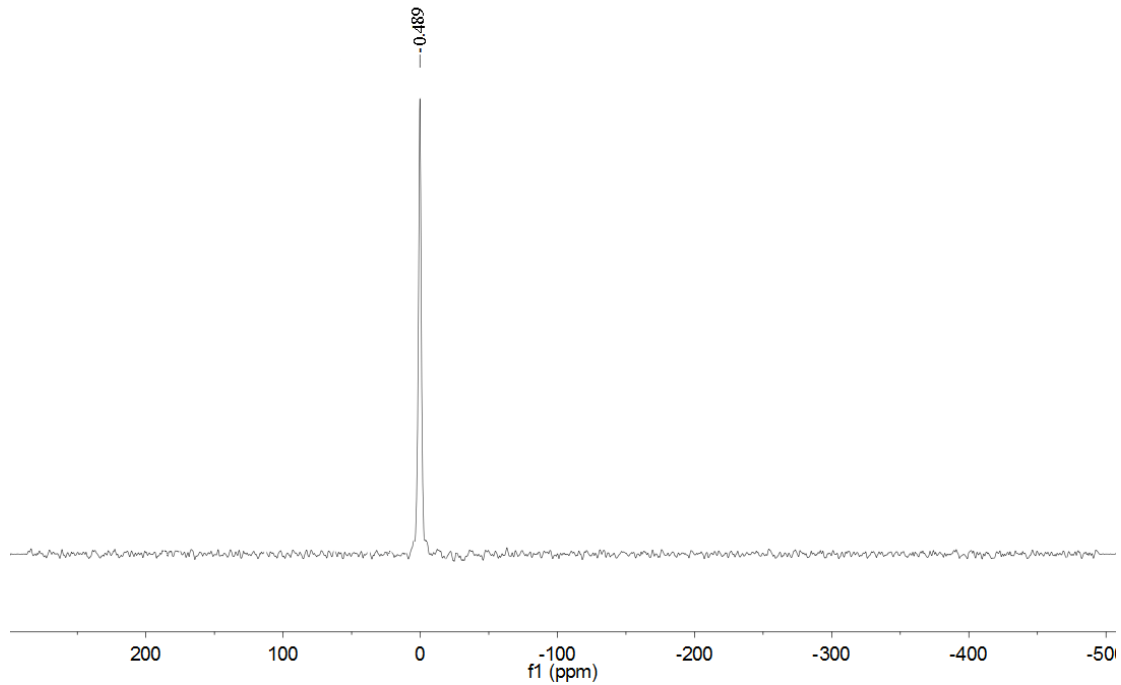

The  $^1\text{H}$ ,  $^{13}\text{C}$ ,  $^{29}\text{Si}$  NMR( $\text{CDCl}_3$ ,  $25^\circ\text{C}$ ) copies of compounds 2:

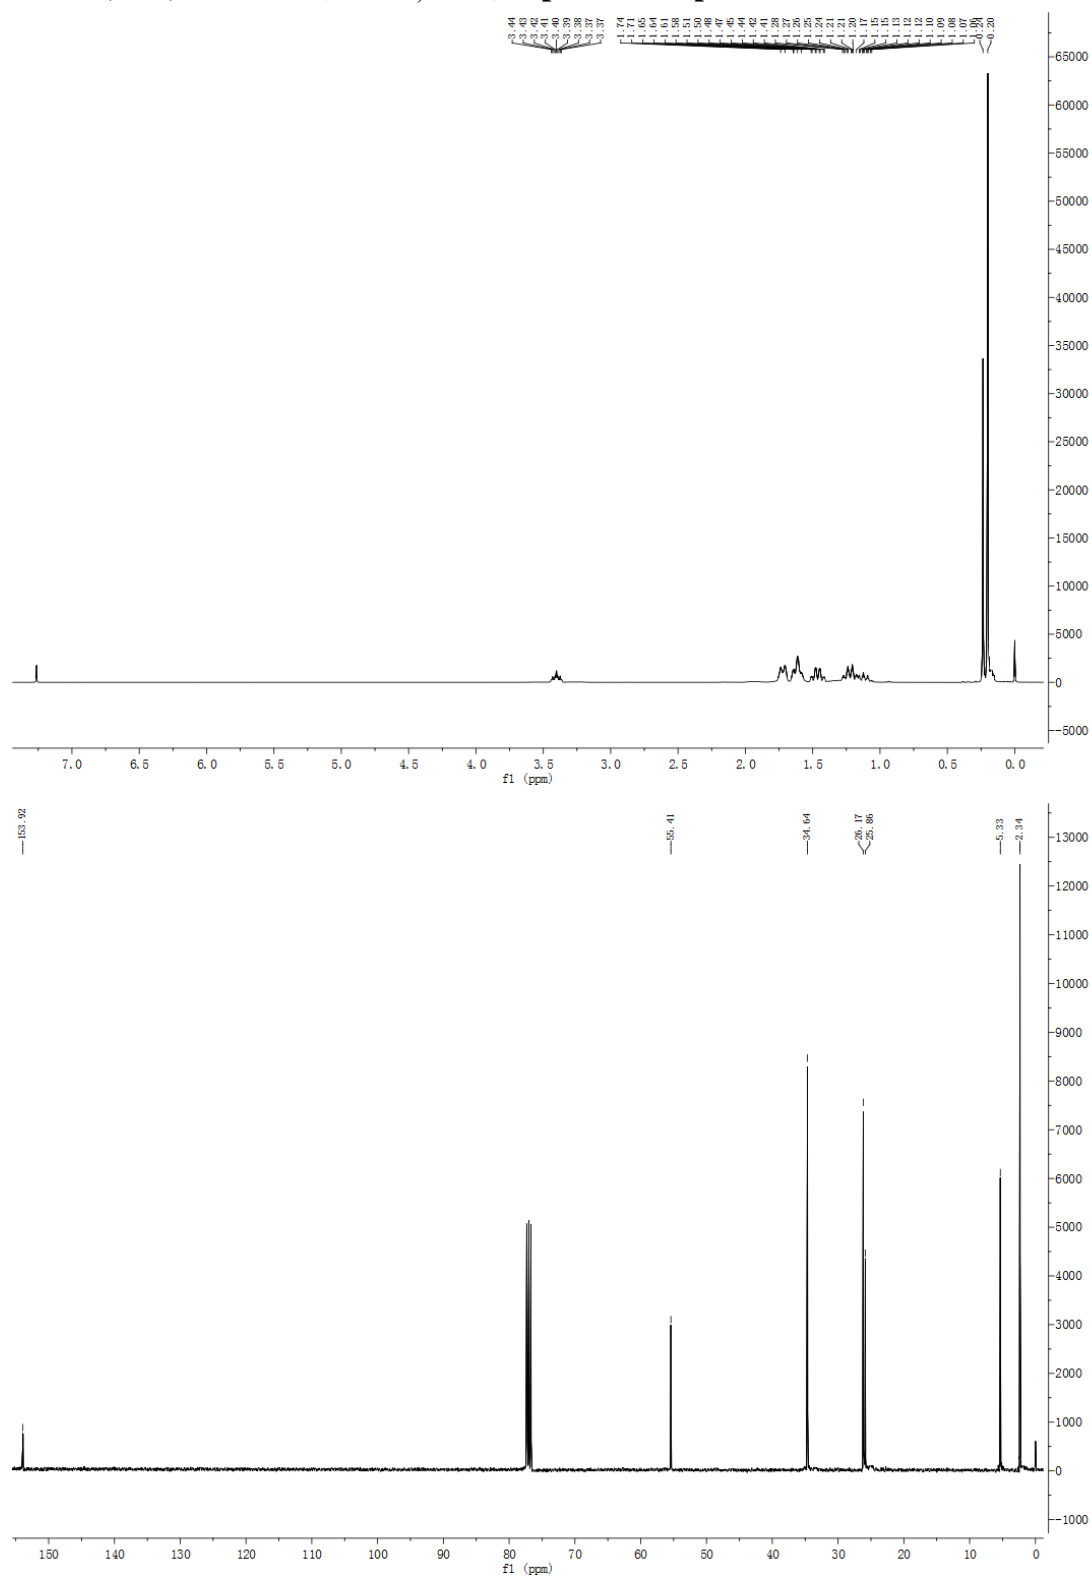

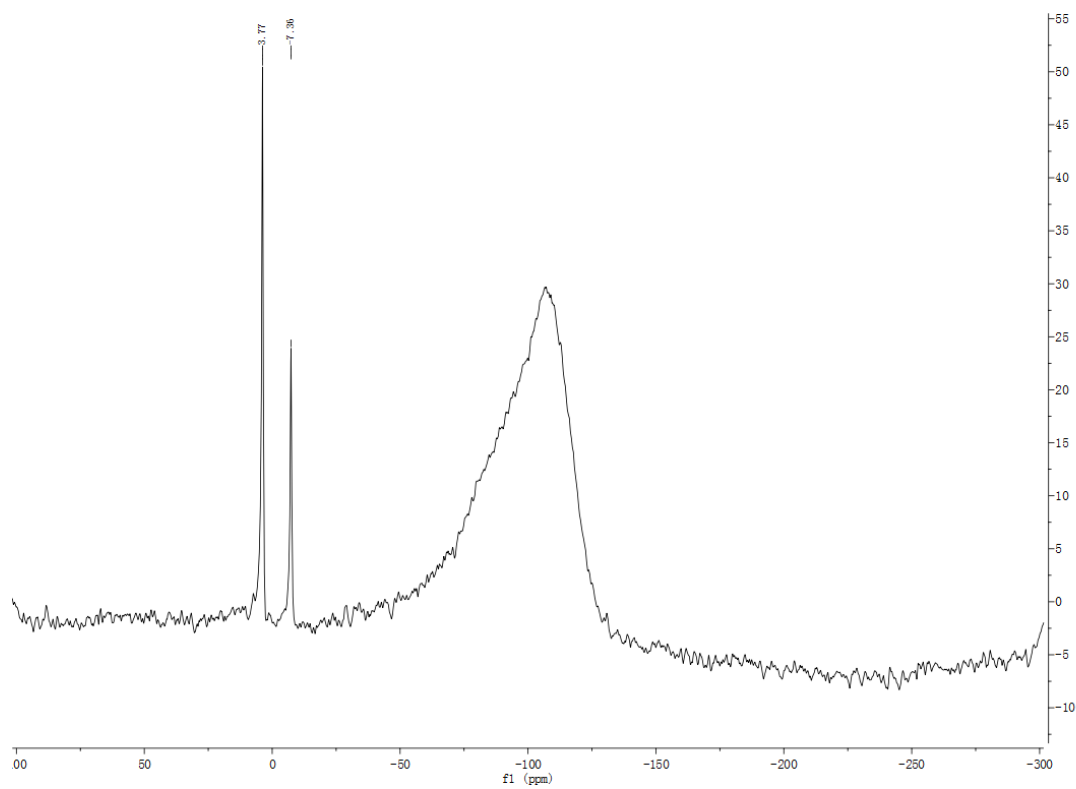

**$^{29}\text{Si}$  CP/MAS NMR(solid state):**

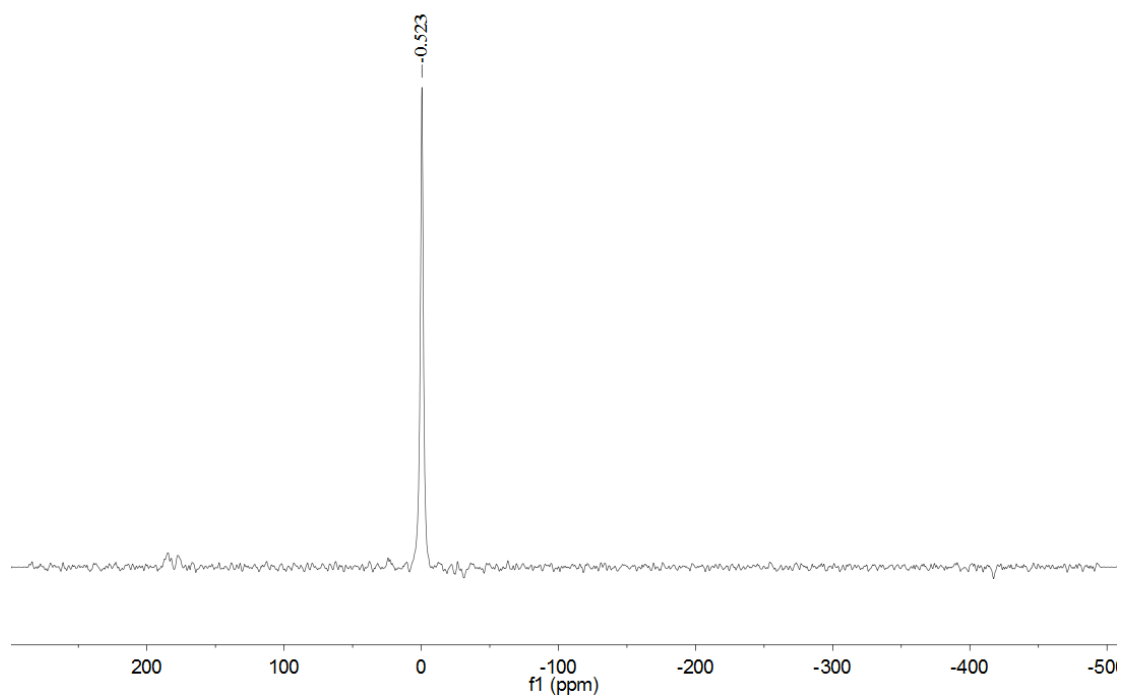

**$^{29}\text{Si}$  NMR( $\text{CD}_2\text{Cl}_2$ ,  $25^\circ\text{C}$ ) copy of compounds 2:**

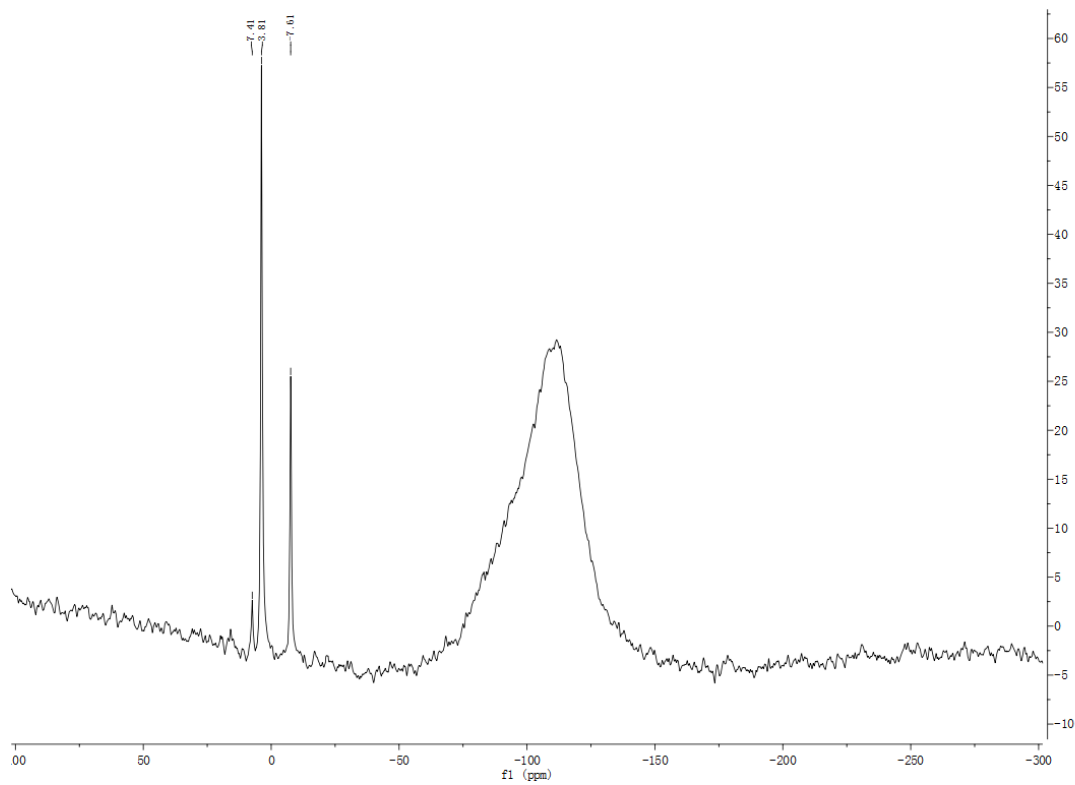

**$^{29}\text{Si}$  NMR(*d*8-Toluene, 25°C) copy of compounds 2:**

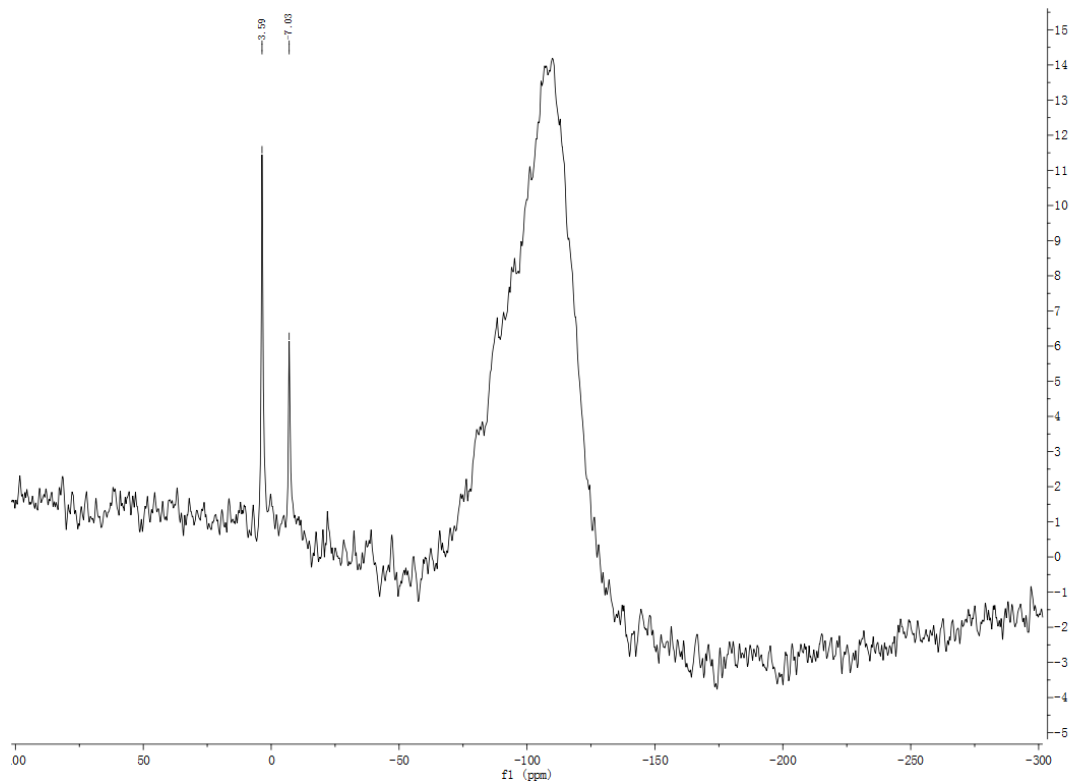

**$^{29}\text{Si}$  NMR(*d*8-Toluene, 40°C) copy of compounds 2:**

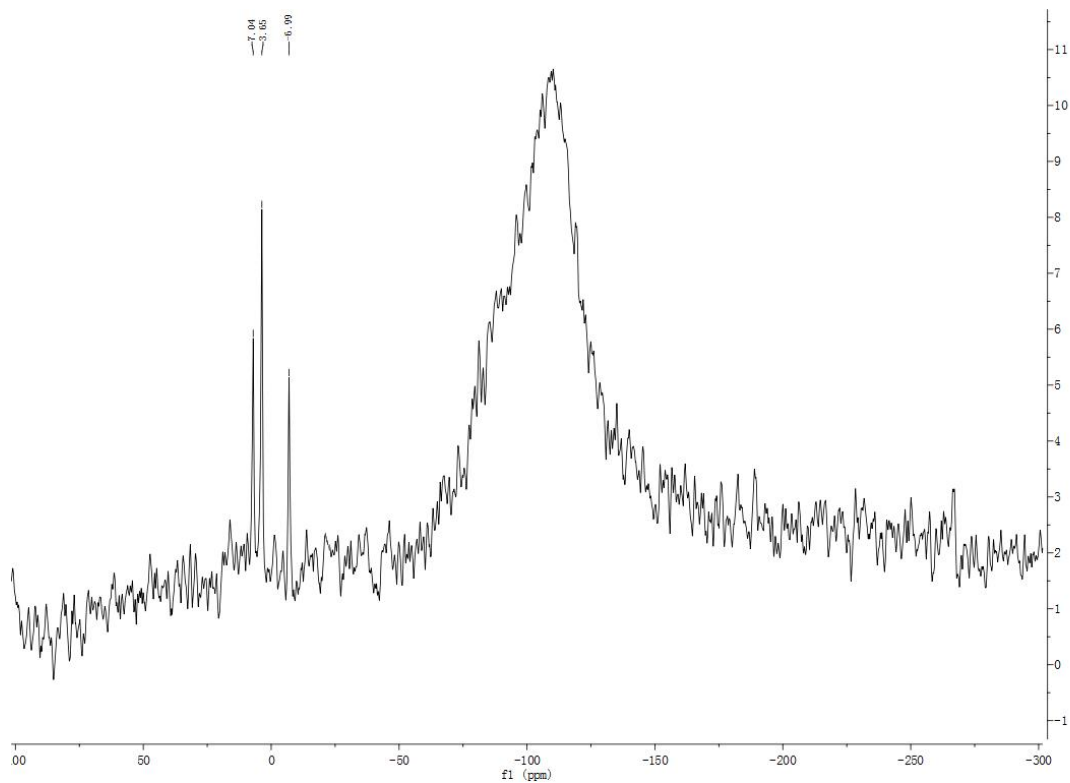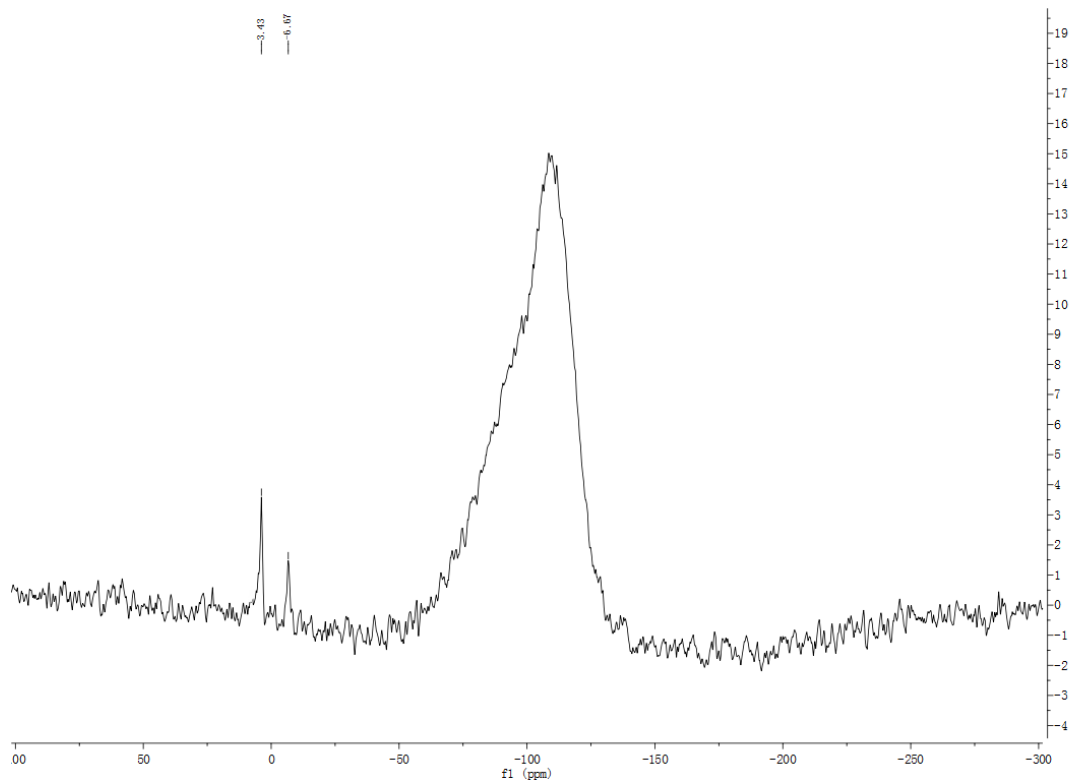

## 2. STA curves

### Compound 1:

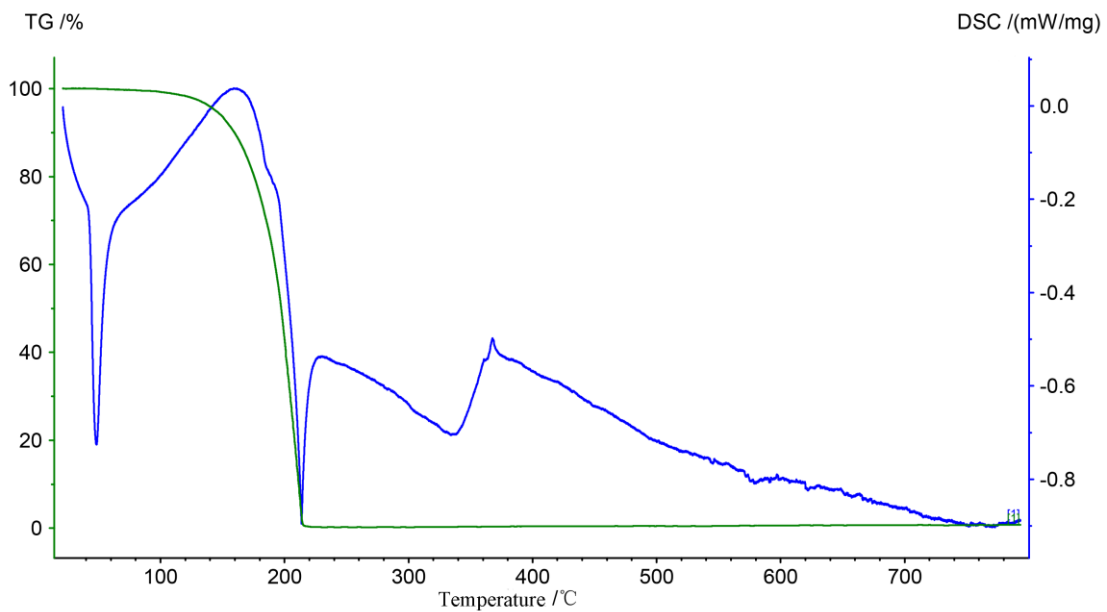

**Isothermal TGA of 1 at 150 °C:**

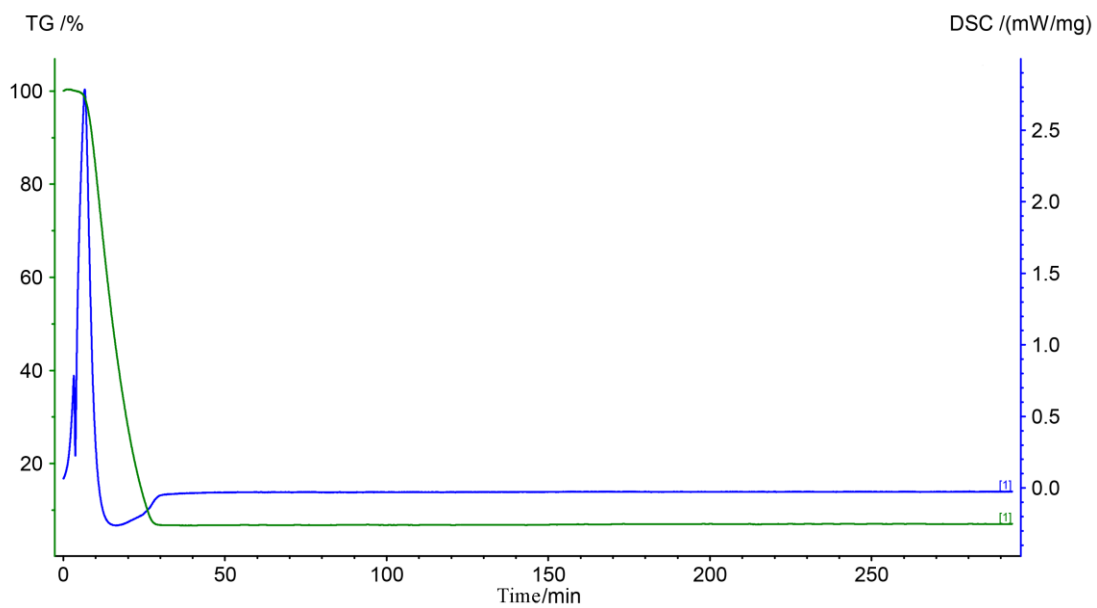

**Compound 2:**



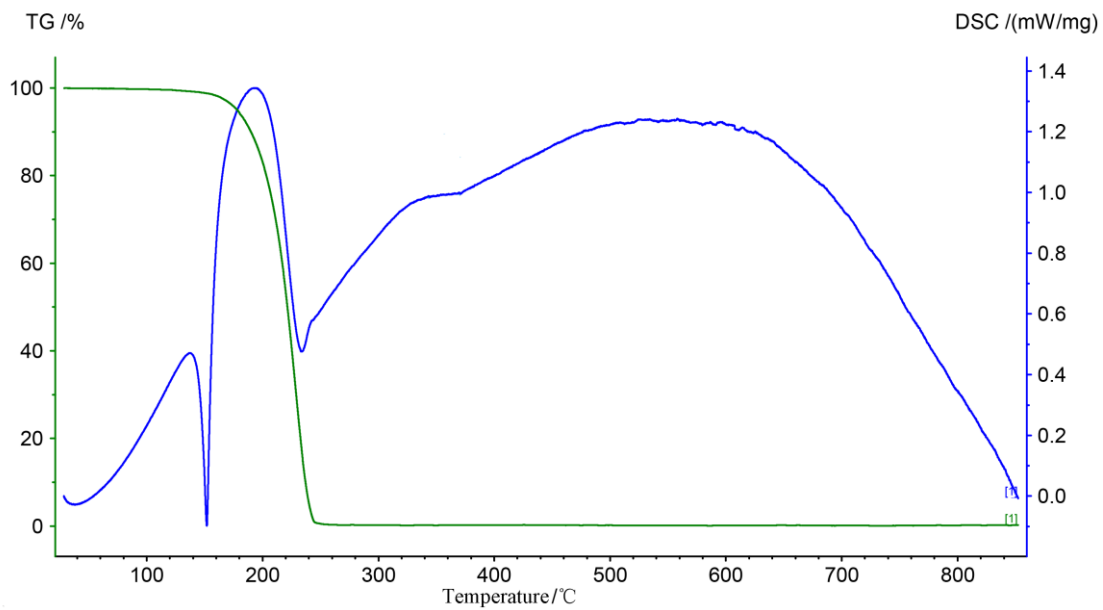

**Isothermal TGA of 2 at 150 °C:**

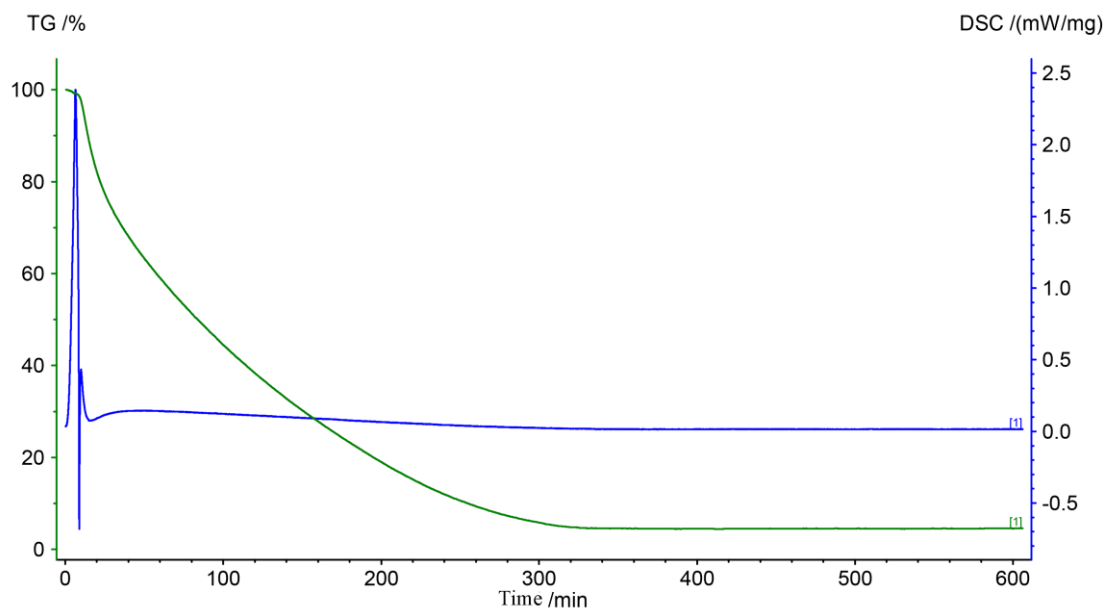

**3. SEM images:**

**Top view of the as-grown film:**

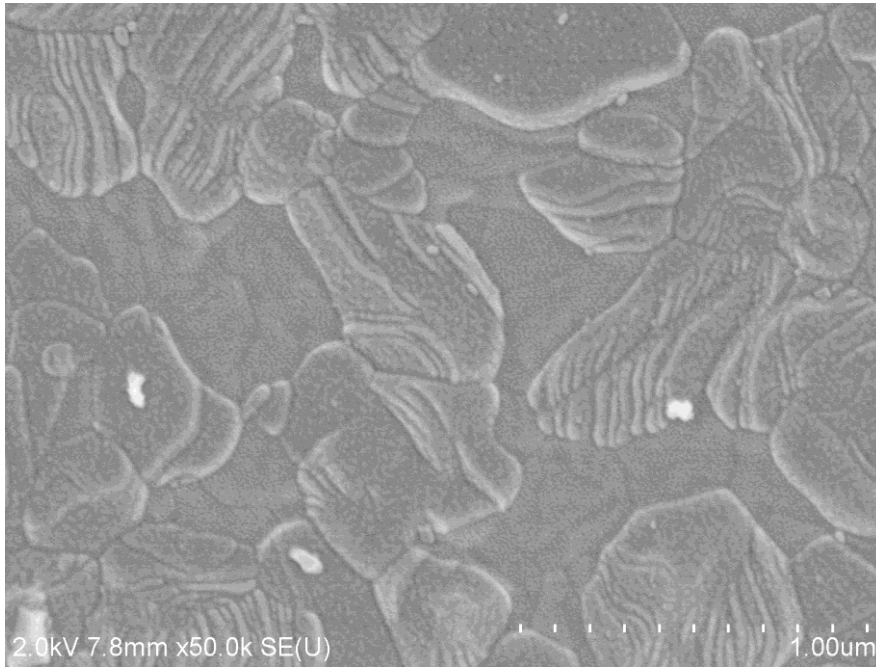

**cross section SEM image of the film:**

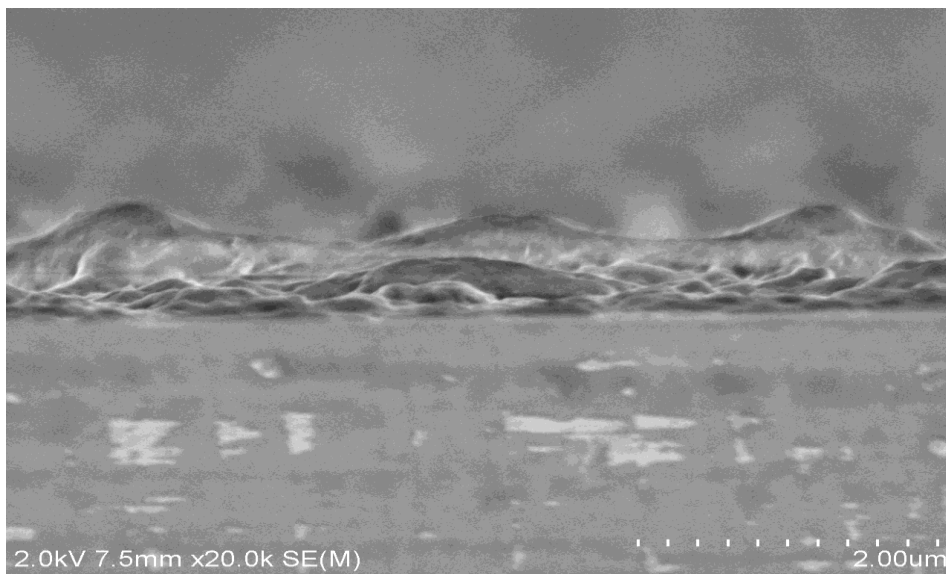

**4. Deposition furnace:**

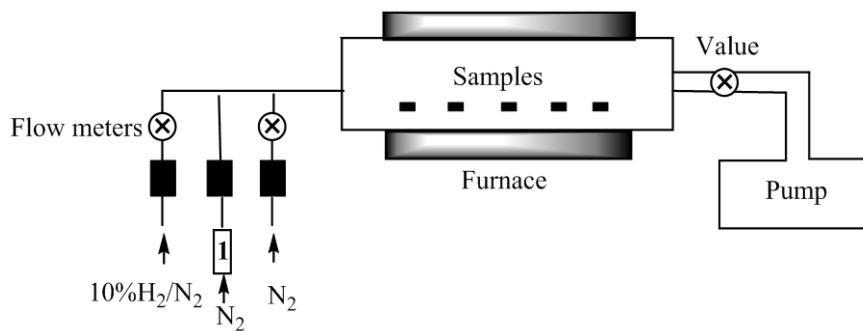

Supplement: c5ra09755j1.pdf [file c5ra09755j1.pdf]
